# Supplementary material for: 3D-printing technologies for electrochemical applications
Source: Royal Society of Chemistry journal article supplement (doi:10.1039/c5cs00714c), 2016-01-01
Supplement: c5cs00714c1.pdf [file c5cs00714c1.pdf]

## Supplementary resources

# 3D-printing technologies for electrochemical applications

Adriano Ambrosi and Martin Pumera

Division of Chemistry & Biological Chemistry, School of Physical and Mathematical  
Sciences, Nanyang Technological University, Singapore 637371, Singapore.

### **Photogrammetry:**

<http://www.photogrammetry.com/>

<https://www.youtube.com/watch?v=2GvVxEhiTiE>

### **Photopolymerization:**

- Stereolithography (digital light projection):

<https://www.youtube.com/watch?v=os1179TQ8Qs>

- Stereolithography (layer configuration or bath configuration):

<https://www.youtube.com/watch?v=yW4EbCWaJHE>

- Stereolithography (bath configuration):

<https://www.youtube.com/watch?v=NM55ct5KwiI>

- Polyjet technology:

<https://www.youtube.com/watch?v=ZjXh1RJfA34>

[https://www.youtube.com/watch?v=apm5Gn2s\\_-M](https://www.youtube.com/watch?v=apm5Gn2s_-M)

**Extrusion:**

- fused deposition modeling (FDM):

<https://www.youtube.com/watch?v=WHO6G67GJbM>

- Robocasting or direct ink writing (DIW):

[https://www.youtube.com/watch?v=ZW\\_ldvrHgLM](https://www.youtube.com/watch?v=ZW_ldvrHgLM)

**Powder based:**

- Binder jetting:

<https://www.youtube.com/watch?v=TQgbMMw1GHo>

<https://www.youtube.com/watch?v=ONMYx1yhJuo>

- Selective laser melting, SLM:

[http://www.concept-laser.de/fileadmin/prozessvideos/Verfahrensanimation\\_EN.mp4](http://www.concept-laser.de/fileadmin/prozessvideos/Verfahrensanimation_EN.mp4)

**Lamination:**

- Laminated object manufacturing:

<https://www.youtube.com/watch?v=Z1WNA6tdfWM>
